# Supplementary material for: Pretreatment MRI Radiomics Based Response Prediction Model in Locally Advanced Cervical Cancer
Source: PubMed Central journal article supplement (PMC8066099; doi:10.3390/diagnostics11040631), 2021-03-31
Supplement: diagnostics-11-00631-s001.pdf [file diagnostics-11-00631-s001.pdf]

## Supplementary Materials

Table S1 – AUC of the ROC curves calculated on the 24 iterations performed for the 15 classifiers considered in the work.

| <i>Iterations</i>   | <i>DT</i>   | <i>LOGREG</i> | <i>C5TREE</i> | <i>HDDA</i> | <i>KNN</i>  | <i>PAM</i>  | <i>PDA</i>  | <i>PLS</i>  | <i>SDA</i>  | <i>NB</i>   | <i>NN</i>   | <i>RF_DEF</i> | <i>RF_GRID</i> | <i>RF_RAND</i> | <i>SVM</i>  |
|---------------------|-------------|---------------|---------------|-------------|-------------|-------------|-------------|-------------|-------------|-------------|-------------|---------------|----------------|----------------|-------------|
| 1                   | 0.87        | 0.89          | 0.84          | 0.60        | 0.79        | 0.47        | 0.69        | 0.83        | 0.72        | 0.88        | 0.83        | 0.70          | 0.81           | 0.75           | 0.85        |
| 2                   | 0.67        | 0.71          | 0.55          | 0.60        | 0.83        | 0.61        | 0.72        | 0.80        | 0.75        | 0.60        | 0.90        | 0.67          | 0.76           | 0.80           | 0.69        |
| 3                   | 0.60        | 0.57          | 0.70          | 0.58        | 0.75        | 0.62        | 0.69        | 0.74        | 0.44        | 0.60        | 0.71        | 0.81          | 0.89           | 0.90           | 0.81        |
| 4                   | 0.59        | 0.65          | 0.54          | 0.57        | 0.71        | 0.88        | 0.79        | 0.73        | 0.48        | 0.62        | 0.81        | 0.92          | 0.78           | 0.88           | 0.74        |
| 5                   | 0.66        | 0.55          | 0.58          | 0.57        | 0.63        | 0.58        | 0.53        | 0.65        | 0.63        | 0.56        | 0.72        | 0.75          | 0.88           | 0.84           | 0.51        |
| 6                   | 0.53        | 0.79          | 0.71          | 0.68        | 0.67        | 0.72        | 0.60        | 0.60        | 0.67        | 0.57        | 0.69        | 1.00          | 0.85           | 0.73           | 0.68        |
| 7                   | 0.90        | 0.47          | 0.72          | 0.74        | 0.58        | 0.65        | 0.83        | 0.49        | 0.85        | 0.74        | 0.86        | 0.81          | 0.83           | 0.83           | 0.58        |
| 8                   | 0.63        | 0.79          | 0.50          | 0.46        | 0.77        | 0.58        | 0.58        | 0.45        | 0.60        | 0.67        | 0.82        | 0.63          | 0.75           | 0.77           | 0.78        |
| 9                   | 0.78        | 0.87          | 0.42          | 0.64        | 0.58        | 0.71        | 0.52        | 0.68        | 0.79        | 0.75        | 0.69        | 0.99          | 0.92           | 0.80           | 0.83        |
| 10                  | 0.70        | 0.58          | 0.52          | 0.72        | 0.58        | 0.61        | 0.61        | 0.65        | 0.71        | 0.77        | 0.70        | 0.69          | 0.77           | 0.83           | 0.69        |
| 11                  | 0.43        | 0.53          | 0.66          | 0.65        | 0.50        | 0.51        | 0.70        | 0.72        | 0.60        | 0.74        | 0.81        | 0.75          | 0.85           | 0.75           | 0.53        |
| 12                  | 0.64        | 0.61          | 0.53          | 0.59        | 0.67        | 0.51        | 0.64        | 0.60        | 0.66        | 0.73        | 0.62        | 0.78          | 0.74           | 0.83           | 0.72        |
| 13                  | 0.85        | 0.63          | 0.66          | 0.80        | 0.58        | 0.65        | 0.71        | 0.65        | 0.76        | 0.78        | 0.72        | 0.81          | 0.71           | 0.78           | 0.80        |
| 14                  | 0.80        | 0.53          | 0.57          | 0.58        | 0.67        | 0.58        | 0.58        | 0.79        | 0.65        | 0.56        | 0.69        | 0.90          | 0.58           | 0.69           | 0.56        |
| 15                  | 0.61        | 0.65          | 0.76          | 0.63        | 0.58        | 0.83        | 0.90        | 0.84        | 0.54        | 0.48        | 0.55        | 0.63          | 0.83           | 0.67           | 0.60        |
| 16                  | 0.75        | 0.81          | 0.64          | 0.86        | 0.63        | 0.60        | 0.89        | 0.72        | 0.75        | 0.64        | 0.81        | 0.78          | 0.81           | 0.80           | 0.70        |
| 17                  | 0.85        | 0.54          | 0.57          | 0.53        | 0.63        | 0.83        | 0.70        | 0.66        | 0.63        | 0.70        | 0.81        | 0.62          | 0.90           | 0.68           | 0.62        |
| 18                  | 0.73        | 0.60          | 0.57          | 0.73        | 0.58        | 0.53        | 0.56        | 0.53        | 0.67        | 0.61        | 0.72        | 0.88          | 0.76           | 0.70           | 0.68        |
| 19                  | 0.53        | 0.78          | 0.75          | 0.67        | 0.75        | 0.75        | 0.53        | 0.59        | 0.70        | 0.69        | 0.73        | 0.75          | 0.70           | 0.74           | 0.85        |
| 20                  | 0.69        | 0.59          | 0.60          | 0.56        | 0.63        | 0.72        | 0.72        | 0.70        | 0.67        | 0.60        | 0.67        | 0.88          | 0.80           | 0.76           | 0.53        |
| 21                  | 0.69        | 0.58          | 0.65          | 0.53        | 0.68        | 0.60        | 0.81        | 0.72        | 0.83        | 0.75        | 0.40        | 0.90          | 0.94           | 0.83           | 0.63        |
| 22                  | 0.66        | 0.77          | 0.82          | 0.58        | 0.81        | 0.67        | 0.61        | 0.73        | 0.73        | 0.72        | 0.81        | 0.70          | 0.82           | 0.90           | 0.70        |
| 23                  | 0.37        | 0.72          | 0.48          | 0.58        | 0.58        | 0.65        | 0.70        | 0.71        | 0.53        | 0.68        | 0.82        | 0.74          | 0.69           | 0.83           | 0.74        |
| 24                  | 0.66        | 0.59          | 0.70          | 0.75        | 0.79        | 0.40        | 0.63        | 0.66        | 0.68        | 0.60        | 0.71        | 0.86          | 0.88           | 0.83           | 0.83        |
| <i>Mean</i>         | <b>0.67</b> | <b>0.66</b>   | <b>0.63</b>   | <b>0.63</b> | <b>0.66</b> | <b>0.64</b> | <b>0.68</b> | <b>0.68</b> | <b>0.67</b> | <b>0.67</b> | <b>0.73</b> | <b>0.79</b>   | <b>0.80</b>    | <b>0.79</b>    | <b>0.69</b> |
| <i>St Deviation</i> | <b>0.13</b> | <b>0.12</b>   | <b>0.11</b>   | <b>0.09</b> | <b>0.09</b> | <b>0.12</b> | <b>0.11</b> | <b>0.10</b> | <b>0.10</b> | <b>0.09</b> | <b>0.11</b> | <b>0.11</b>   | <b>0.08</b>    | <b>0.07</b>    | <b>0.11</b> |
